# Supplementary material
Source: publisher site journal article supplement (https://www.dovepress.com/get_supplementary_file.php?f=393224.docx)
Supplement: Supplementary file 1 [file get_supplementary_file.php]

# Supplementary Tables

Table S1 The position of the genes CpG regions and primer sequences

| Gene | Fragment | Chr | TSS | TES | Start | End | Length | Distance2TSS | FPrimer | RPrimer |
| --- | --- | --- | --- | --- | --- | --- | --- | --- | --- | --- |
| CYP24A1 | CPG-01 | chr20 | 54173986 | 54153445 | 54174469 | 54174217 | 253 | -483 | AGGTTGGGGGTATTTGGTTTTT | AACTCCACCCCRAAAATAACC |
| CPG-02 | chr20 | 54173986 | 54153445 | 54173363 | 54173579 | 217 | 623 | TTTGTAGTAGGTTGTTTAGTAGTGGTTAGTT | ATAAACTCCCCCATCAACAAAAA |
| CPG-03 | chr20 | 54173986 | 54153445 | 54173182 | 54173396 | 215 | 804 | TTTTAGGGGATYGGGGATTTT | ACCAACTAACCACTACTAAACAACCTAC |
| CPG-04 | chr20 | 54173986 | 54153445 | 54172687 | 54172920 | 234 | 1299 | GAGAAYGTAGGTGTTGGGTGTATAGTA | ACTACTAATCCTATAAATCCAATCCRAA |
| CYP27B1 | CPG-05 | chr12 | 57767078 | 57762333 | 57765980 | 57766243 | 264 | 1098 | GGGTTTTTGGGGGTAGAGA | AATCCCCRCCCAAATATCCA |
| CYP2R1 | CPG-06 | chr11 | 14892205 | 14878009 | 14891662 | 14891418 | 245 | 543 | GTTATTTTAGGTTTAGGGTGGAYGTATG | TTCACAATCRTTTCCCAAAACC |
| CPG-07 | chr11 | 14892205 | 14878009 | 14891347 | 14891098 | 250 | 858 | TGGTTGGGAAYGGTATTTTAGTAGAT | CTCTATCCCAAAACCCRTAAAAACTCCTA |
| DHCR7 | CPG-10 | chr11 | 71448431 | 71434410 | 71447827 | 71448080 | 254 | 604 | GGTAGAAGGTTTAGTGTTTAGGGTTT | CCACRAACCRACRTCTAAAAAATACTCTA |
| CPG-11 | chr11 | 71448431 | 71434410 | 71448411 | 71448659 | 249 | 20 | TTTYGGATGATGTTAGYGATTGTTTGTT | CCACCCCCAACTAATCAACTAAA |
| VDR | CPG-08 | chr12 | 47904994 | 47841536 | 47905060 | 47904813 | 248 | -66 | GAGAGGYGGGGTTAGGTGTTG | ACCCRAACCTCAATAACCAAATTTAC |
| CPG-09 | chr12 | 47904994 | 47841536 | 47905711 | 47905500 | 212 | -717 | AGGGATTAGGGAAGTTGAGATTTAGTT | TCCRCTCRCCAACCTATTACTACTACAA |

Table S2: Methylation levels of genes in TB-DM stratified by Diabetes Status

| Genes | Diabetes-good control | Diabetes-poor control | *P* value |
| --- | --- | --- | --- |
|  | N=10 | N=40 |  |
| CYP24A1 | 3.30 [3.24;3.64] | 3.29 [2.91;3.67] | 0.544 |
| CYP27B1 | 4.19 [3.51;4.99] | 3.84 [3.33;4.50] | 0.370 |
| DHCR7 | 2.36 [2.23;2.80] | 2.53 [2.37;2.68] | 0.423 |
| VDR | 1.84 [1.59;1.89] | 1.65 [1.46;1.81] | 0.133 |

Table S3: Methylation levels of genes in TB-DM by single cavity feature

| CT features | Single cavity | | P value |
| --- | --- | --- | --- |
|  | No | Yes |  |
|  | N=34 | N=16 |  |
| CYP24A1 | 3.29 [2.94;3.77] | 3.24 [2.97;3.51] | 0.574 |
| CYP27B1 | 4.04 [3.17;4.85] | 3.71 [3.52;4.08] | 0.677 |
| DHCR7 | 2.50 [2.29;2.64] | 2.53 [2.39;2.69] | 0.533 |
| VDR | 1.62 [1.48;1.83] | 1.70 [1.59;1.82] | 0.560 |

Table S4: Methylation levels of genes in TB-DM by multiple cavities feature

| Genes | Multiple cavities | | *P* value |
| --- | --- | --- | --- |
|  | No | Yes |  |
|  | N=25 | N=25 |  |
| CYP24A1 | 3.34 [3.00;3.74] | 3.29 [2.92;3.64] | 0.900 |
| CYP27B1 | 0.67 [0.63;0.70] | 0.67 [0.64;0.71] | 0.900 |
| DHCR7 | 3.76 [3.48;4.26] | 4.04 [3.18;5.10] | 0.410 |
| VDR | 2.46 [2.26;2.68] | 2.53 [2.37;2.68] | 0.594 |

Table S5: Methylation levels of genes in TB-DM by air bronchogram sign feature

| CT features | Air bronchogram sign | | *P* value |
| --- | --- | --- | --- |
|  | No | Yes |  |
|  | N=36 | N=14 |  |
| CYP24A1 | 3.30 [3.00;3.73] | 3.28 [2.69;3.51] | 0.489 |
| CYP27B1 | 0.67 [0.65;0.70] | 0.64 [0.61;0.67] | 0.101 |
| DHCR7 | 3.87 [3.50;4.63] | 3.52 [2.94;4.57] | 0.437 |
| VDR | 2.50 [2.37;2.68] | 2.48 [1.97;2.74] | 0.545 |
